# Supplementary material for: Control of Neuropeptide Expression by Parallel Activity-dependent Pathways in Caenorhabditis elegans
Source: PubMed Central journal article supplement (PMC5282578; doi:10.1038/srep38734), 2017-01-31
Supplement: srep38734-s1.pdf [file srep38734-s1.pdf]

**Control of Neuropeptide Expression by Parallel Activity-dependent Pathways  
in *Caenorhabditis elegans***

Teresa Rojo Romanos<sup>1,2</sup>, Jakob Gramstrup Petersen<sup>2</sup> and Roger Pocock<sup>1,2</sup>

## Figure S1.

(A) Table showing the BAG reporters tested for expression in the *gcy-9(n4470)* mutant. None of the reporters exhibited a detectable defect in BAG expression.

(B) The BAG neurons are generated in *tax-4(p678)* mutant animals. Representative micrograph showing the expression of the BAG reporter *rpls32(Pegl-13::GFP)* in a hermaphrodite worm mutant for *tax-4(p678)*. Both BAG neurons show wild type expression of the reporter. BAG positions are marked with red dashed circles. Anterior to the left. Scale bar = 20 $\mu$ m.

(C) Micrograph showing the expression of *flp-13::GFP* in the *crh-1(tz2); gcy-9(n4470)* double mutant. Expression of the reporter in is unaffected in the BAG neurons. BAG positions are marked with red dashed circles. Anterior to the left. Scale bar = 20 $\mu$ m.

## Table S1.

List of strains used in this study.

A

| <i>gcy-9(n4470)</i>            |           |    |
|--------------------------------|-----------|----|
| Transgene                      | Defective | n  |
| <i>ynIs64[flp-17::GFP]</i>     | NO        | 55 |
| <i>ynIs37[flp-13::GFP]</i>     | NO        | 54 |
| <i>rplS29[gcy-31::mCherry]</i> | NO        | 69 |
| <i>rplS7[gcy-33::GFP]</i>      | NO        | 51 |
| <i>rplS32[egl-13::GFP]</i>     | NO        | 61 |

B

*tax-4(p678); egl-13::GFP*

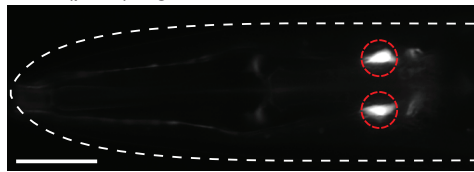

C

*crh-1(tz2); gcy-9(n4470); flp-13::GFP*

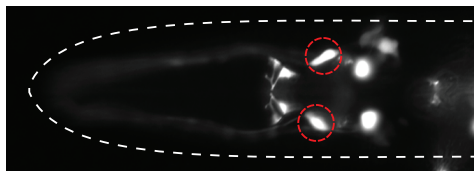

Figure S1

|                    | Strain number                                                                        | Genotype                                                                            |
|--------------------|--------------------------------------------------------------------------------------|-------------------------------------------------------------------------------------|
| <b>Figure 1</b>    | RJP255                                                                               | <i>ynIs34[flp-19::gfp]; him-5(e1490)</i>                                            |
|                    | RJP1206                                                                              | <i>che-3(e1379); ynIs34[flp-19::gfp]</i>                                            |
|                    | RJP1143                                                                              | <i>tub-1(ok1972); ynIs34[flp-19::gfp]</i>                                           |
|                    | RJP1968                                                                              | <i>rpEx811[flp-19::GFP]</i>                                                         |
|                    | RJP1969                                                                              | <i>che-3(e1379); rpEx811[flp-19::GFP]</i>                                           |
| <b>Figure 2</b>    | RJP1254                                                                              | <i>gcy-9(n4470); ynIs34[flp-19::gfp]</i>                                            |
|                    | RJP1560                                                                              | <i>gcy-9(tm2816); ynIs34[flp-19::gfp]</i>                                           |
|                    | RJP1814                                                                              | <i>gcy-9(n4470); ynIs34[flp-19::gfp]; rpEx765[gcy-331K::gcy-9cDNA + myo-3::RFP]</i> |
|                    | RJP1815                                                                              | <i>gcy-9(n4470); ynIs34[flp-19::gfp]; rpEx766[gcy-331K::gcy-9cDNA + myo-3::RFP]</i> |
|                    | RJP2027                                                                              | <i>gcy-9(n4470); ynIs34[flp-19::gfp]; rpEx837[gcy-331K::gcy-9cDNA + myo-3::RFP]</i> |
|                    | RJP1268                                                                              | <i>gcy-31(ok296); ynIs34[flp-19::gfp]; him-5(e1490)</i>                             |
|                    | RJP1247                                                                              | <i>gcy-33(ok232); ynIs34[flp-19::gfp]</i>                                           |
|                    | RJP1459                                                                              | <i>gcy-35(ok769); ynIs34[flp-19::gfp]; him-5(e1490)</i>                             |
|                    | RJP1260                                                                              | <i>gcy-36(db42); ynIs34[flp-19::gfp]</i>                                            |
| RJP3000            | <i>gcy-35(ok769); gcy-33(ok232); gcy-36(db42) gcy-31(ok296); ynIs34[flp-19::gfp]</i> |                                                                                     |
| <b>Figure 3</b>    | RJP3008                                                                              | <i>pde-1(nj57); ynIs34[flp-19::gfp]</i>                                             |
|                    | RJP3033                                                                              | <i>pde-1(nj57); gcy-9(n4470); ynIs34[flp-19::gfp]</i>                               |
|                    | RJP1388                                                                              | <i>tax-4(p678); ynIs34[flp-19::gfp]</i>                                             |
|                    | RJP2021                                                                              | <i>tax-4(p678); pde-1(nj57); ynIs34[flp-19::gfp]</i>                                |
|                    | RJP3226                                                                              | <i>ynIs34[flp-19::gfp]; rpEx1563[gcy-33::egl-2(gf) + myo-3::rfp]</i>                |
| <b>Figure 4</b>    | RJP3293                                                                              | <i>crh-1(n3315); ynIs34[flp-19::gfp]</i>                                            |
|                    | RJP1365                                                                              | <i>crh-1(tz2); ynIs34[flp-19::gfp]; him-5(e1490)</i>                                |
|                    | RJP3031                                                                              | <i>kin-2(ce179); ynIs34[flp-19::gfp]</i>                                            |
|                    | RJP3277                                                                              | <i>crh-1(tz2); kin-2(e179); ynIs34[flp-19::gfp]</i>                                 |
|                    | RJP3032                                                                              | <i>crh-1(tz2); gcy-9(n4470); ynIs34[flp-19::gfp]</i>                                |
| <b>Suppl Fig 1</b> | RJP1387                                                                              | <i>gcy-9(n4470); ynIs64[flp-17::GFP]</i>                                            |
|                    | RJP1566                                                                              | <i>gcy-9(n4470); ynIs37[flp-13::GFP]</i>                                            |
|                    | RJP1567                                                                              | <i>gcy-9(n4470); rpls29[gcy-31::mCherry; elt-2::gfp]</i>                            |
|                    | RJP1558                                                                              | <i>gcy-9(n4470); rpls7[gcy-33::GCY-33::GFP]</i>                                     |
|                    | RJP1534                                                                              | <i>gcy-9(n4470); rpls32[egl-13::GFP]</i>                                            |
|                    | RJP1574                                                                              | <i>tax-4(p678); rpls32[egl-13::GFP]</i>                                             |
|                    | RJP3123                                                                              | <i>crh-1(tz2); gcy-9(n4470); ynIs37[flp-13::GFP]</i>                                |
| <b>Table 1</b>     | RJP1792                                                                              | <i>egl-3(nr2090); ynIs34[flp-19::gfp]</i>                                           |
|                    | RJP1953                                                                              | <i>unc-31(e169); ynIs34[flp-19::gfp]</i>                                            |
|                    | RJP1453                                                                              | <i>unc-13(e1091); ynIs34[flp-19::gfp]</i>                                           |
|                    | RJP1580                                                                              | <i>eat-4(ky5); ynIs34[flp-19::gfp]</i>                                              |
|                    | RJP1796                                                                              | <i>snb-1(md247); ynIs34[flp-19::gfp]; him-5(e1490)</i>                              |
|                    | RJP3273                                                                              | <i>jun-1(gk557); ynIs34[flp-19::gfp]</i>                                            |
|                    | RJP1967                                                                              | <i>egl-4(n479); ynIs34[flp-19::gfp]</i>                                             |
|                    | RJP1570                                                                              | <i>cmk-1(ok287); ynIs34[flp-19::gfp]</i>                                            |
|                    | RJP1556                                                                              | <i>cck-1(ok1033); ynIs34[flp-19::gfp]; him-5(e1490)</i>                             |
|                    | RJP1370                                                                              | <i>rgs-3(ok2288); ynIs34[flp-19::gfp]</i>                                           |

Table S1
